# Supplementary material
Source: HighWire-hosted journal article supplement (http://www.cmaj.ca/highwire/filestream/71435/field_highwire_adjunct_files/1/180551-res-2-at.pdf)
Supplement: 180551-res-2-at.pdf [file 180551-res-2-at.pdf]

## Appendix 2 (as supplied by the authors)

Table. Complete Baseline Characteristics of a Cohort of Older Adults Prescribed Trazodone or Atypical Antipsychotics

| Characteristic                 |         | Trazodone<br>N=6,588 | Atypical<br>Antipsychotics<br>N=2,875 | Crude<br>Standardize<br>d Difference | Trazodone<br>N=6,588 | Atypical<br>Antipsychotics<br>N=2,875 | Weighted<br>Standardized<br>Difference |
|--------------------------------|---------|----------------------|---------------------------------------|--------------------------------------|----------------------|---------------------------------------|----------------------------------------|
| <i>Demographics</i>            |         |                      |                                       |                                      |                      |                                       |                                        |
| Year of cohort entry, n (%)    | 2010    | 2,101 (31.9%)        | 623 (21.7%)                           | 0.23                                 | 28.70%               | 28.10%                                | 0.01                                   |
|                                | 2011    | 851 (12.9%)          | 567 (19.7%)                           | 0.18                                 | 15.10%               | 15%                                   | <0.01                                  |
|                                | 2012    | 686 (10.4%)          | 480 (16.7%)                           | 0.18                                 | 12.30%               | 12.30%                                | <0.01                                  |
|                                | 2013    | 860 (13.1%)          | 483 (16.8%)                           | 0.11                                 | 14.20%               | 14.30%                                | <0.01                                  |
|                                | 2014    | 979 (14.9%)          | 365 (12.7%)                           | 0.06                                 | 14.20%               | 14.40%                                | 0.01                                   |
|                                | 2015    | 1,111 (16.9%)        | 357 (12.4%)                           | 0.13                                 | 15.60%               | 16%                                   | 0.01                                   |
| Age at cohort entry, mean (SD) |         | 85.48 ± 7.22         | 85.00 ± 7.07                          | 0.07                                 | 85.3 (7.2)           | 85.5 (7.3)                            | 0.02                                   |
| Age, n (%)                     | 66-74   | 556 (8.4%)           | 236 (8.2%)                            | 0.01                                 | 8.40%                | 8.30%                                 | <0.01                                  |
|                                | 75-84   | 2,128 (32.3%)        | 1,004 (34.9%)                         | 0.06                                 | 33.00%               | 32.40%                                | 0.01                                   |
|                                | 85+     | 3,904 (59.3%)        | 1,635 (56.9%)                         | 0.05                                 | 58.60%               | 59.30%                                | 0.02                                   |
| Female, n (%)                  |         | 4,594 (69.7%)        | 1,908 (66.4%)                         | 0.07                                 | 68.60%               | 68.20%                                | 0.01                                   |
| Weight (kg), mean (SD)         |         | 65.86 ± 29.10        | 65.17 ± 29.99                         | 0.02                                 | 65.7<br>(29.7)       | 65.6 (33.7)                           | <0.01                                  |
| Income quintile                | missing | 66 (1.0%)            | 36 (1.3%)                             | 0.02                                 | 1.10%                | 1.20%                                 | 0.01                                   |
|                                | 1       | 1,549 (23.5%)        | 663 (23.1%)                           | 0.01                                 | 23.40%               | 23.10%                                | 0.01                                   |
|                                | 2       | 1,274 (19.3%)        | 532 (18.5%)                           | 0.02                                 | 19%                  | 18.90%                                | <0.01                                  |
|                                | 3       | 1,335 (20.3%)        | 600 (20.9%)                           | 0.01                                 | 20.70%               | 21.20%                                | 0.01                                   |
|                                | 4       | 1,254 (19.0%)        | 508 (17.7%)                           | 0.04                                 | 18.50%               | 18.10%                                | 0.01                                   |
|                                | 5       | 1,110 (16.8%)        | 536 (18.6%)                           | 0.05                                 | 17.30%               | 17.40%                                | <0.01                                  |

|                                       |                  |                  |      |            |           |       |
|---------------------------------------|------------------|------------------|------|------------|-----------|-------|
| Dependency in $\geq 1$ ADLs           | 6,556 (99.5%)    | 2,859 (99.4%)    | 0.01 | 99.50%     | 99.50%    | <0.01 |
| Dependency in ADLs, mean (SD)         | 5.20 $\pm$ 1.33  | 5.35 $\pm$ 1.16  | 0.12 | 5.3 (1.3)  | 5.3 (1.2) | 0.03  |
| <i>Healthcare Utilization</i>         |                  |                  |      |            |           |       |
| Prescriptions, mean (SD)              | 19.45 $\pm$ 9.97 | 17.63 $\pm$ 9.68 | 0.18 | 18.9 (9.9) | 18.8 (10) | 0.01  |
| ER visits, mean (SD)                  | 1.52 $\pm$ 2.85  | 1.39 $\pm$ 1.95  | 0.05 | 1.5 (2.7)  | 1.5 (2.1) | 0.01  |
| Psychiatrist visits, mean (SD)        | 0.34 $\pm$ 2.39  | 0.40 $\pm$ 2.36  | 0.03 | 0.4 (2.6)  | 0.4 (2.4) | 0.02  |
| Geriatrician visits, mean (SD)        | 0.56 $\pm$ 3.47  | 0.57 $\pm$ 2.91  | 0    | 0.6 (3.5)  | 0.6 (3.4) | 0.02  |
| Inpatient hospitalizations, mean (SD) | 0.66 $\pm$ 1.00  | 0.58 $\pm$ 0.95  | 0.09 | 0.6 (1)    | 0.6 (1)   | 0.02  |
| Johns Hopkins ACG score, n (%)        |                  |                  |      |            |           |       |
| 0-5                                   | 1,601 (24.3%)    | 812 (28.2%)      | 0.09 | 25.70%     | 25.60%    | <0.01 |
| 6-10                                  | 2,173 (33.0%)    | 965 (33.6%)      | 0.01 | 33.20%     | 33.20%    | <0.01 |
| 11+                                   | 2,814 (42.7%)    | 1,098 (38.2%)    | 0.09 | 41.20%     | 41.10%    | <0.01 |
| Antiarrhythmics, n (%)                | 2,981 (45.2%)    | 1,060 (36.9%)    | 0.17 | 42.60%     | 41.90%    | 0.01  |
| Anticoagulants, n (%)                 | 1,498 (22.7%)    | 515 (17.9%)      | 0.12 | 21.10%     | 21.40%    | 0.01  |
| Hypoglycemic agents, n (%)            | 1,416 (21.5%)    | 570 (19.8%)      | 0.04 | 20.80%     | 19.80%    | 0.03  |
| Antihypertensives, n (%)              | 4,606 (69.9%)    | 1,895 (65.9%)    | 0.09 | 68.50%     | 67.70%    | 0.02  |
| Antilipemics, n (%)                   | 3,015 (45.8%)    | 1,252 (43.5%)    | 0.04 | 44.90%     | 44.30%    | 0.01  |
| Diuretics, n (%)                      | 2,301 (34.9%)    | 798 (27.8%)      | 0.16 | 32.70%     | 32.30%    | 0.01  |
| Glucocorticoids, n (%)                | 607 (9.2%)       | 205 (7.1%)       | 0.08 | 8.50%      | 8%        | 0.02  |
| Hormone therapies, n (%)              | 150 (2.3%)       | 32 (1.1%)        | 0.09 | 1.90%      | 1.70%     | 0.02  |
| Osteoporosis medications, n (%)       | 1,551 (23.5%)    | 663 (23.1%)      | 0.01 | 23.40%     | 23%       | 0.01  |
| Antiparkinsonian agents, n (%)        | 501 (7.6%)       | 220 (7.7%)       | 0    | 7.60%      | 7.90%     | 0.01  |
| Antiplatelet agents, n (%)            | 1,089 (16.5%)    | 406 (14.1%)      | 0.07 | 15.70%     | 15.30%    | 0.01  |
| Pain medications, n (%)               | 2,892 (43.9%)    | 1,106 (38.5%)    | 0.11 | 42%        | 41.30%    | 0.02  |
| Psychoactive agents, n (%)            | 4,842 (73.5%)    | 2,273 (79.1%)    | 0.13 | 75.20%     | 74.80%    | 0.01  |
| <i>Medical History</i>                |                  |                  |      |            |           |       |
| Alcoholism, n (%)                     | 329 (5.0%)       | 128 (4.5%)       | 0.03 | 4.90%      | 5.20%     | 0.02  |
| Cardiac dysrhythmias, n (%)           | 1,838 (27.9%)    | 683 (23.8%)      | 0.09 | 26.50%     | 26.10%    | 0.01  |
| Cerebrovascular disease, n (%)        | 1,526 (23.2%)    | 607 (21.1%)      | 0.05 | 22.50%     | 22.30%    | 0.01  |

|                                    |               |               |      |        |        |       |
|------------------------------------|---------------|---------------|------|--------|--------|-------|
| Delusions or hallucinations, n (%) | 251 (3.8%)    | 266 (9.3%)    | 0.22 | 5.70%  | 5.90%  | 0.01  |
| Depression, n (%)                  | 2,072 (31.5%) | 871 (30.3%)   | 0.03 | 31.10% | 30.80% | 0.01  |
| Diabetes mellitus, n (%)           | 2,285 (34.7%) | 947 (32.9%)   | 0.04 | 34.10% | 34.10% | <0.01 |
| Falls, n (%)                       | 1,619 (24.6%) | 679 (23.6%)   | 0.02 | 24.20% | 24.70% | 0.01  |
| Major osteoporotic fracture, n (%) | 975 (14.8%)   | 373 (13.0%)   | 0.05 | 14.20% | 14.80% | 0.02  |
| Unsteady gait, n (%)               | 6,069 (92.1%) | 2,527 (87.9%) | 0.14 | 90.70% | 90.90% | 0.01  |
| Hearing impairment, n (%)          | 2,967 (45.0%) | 1,307 (45.5%) | 0.01 | 45.10% | 45.20% | <0.01 |
| Ischemic heart disease, n (%)      | 1,774 (26.9%) | 678 (23.6%)   | 0.08 | 25.80% | 25.60% | 0.01  |
| Hypertension, n (%)                | 5,564 (84.5%) | 2,296 (79.9%) | 0.12 | 82.80% | 82.60% | 0.01  |
| Chronic kidney disease, n (%)      | 54 (0.8%)     | 10 (0.3%)     | 0.06 | 0.70%  | 0.50%  | 0.02  |
| Chronic liver disease, n (%)       | 64 (1.0%)     | 24 (0.8%)     | 0.01 | 0.90%  | 0.90%  | <0.01 |
| Malignancy, n (%)                  | 612 (9.3%)    | 247 (8.6%)    | 0.02 | 9%     | 8.90%  | <0.01 |
| Osteoporosis, n (%)                | 3,044 (46.2%) | 1,252 (43.5%) | 0.05 | 45.40% | 45.40% | <0.01 |
| Parkinsonism, n (%)                | 481 (7.3%)    | 212 (7.4%)    | 0    | 7.40%  | 7.60%  | 0.01  |
| Peripheral vascular disease, n (%) | 496 (7.5%)    | 148 (5.1%)    | 0.1  | 6.80%  | 6.80%  | <0.01 |
| Rheumatoid arthritis, n (%)        | 219 (3.3%)    | 83 (2.9%)     | 0.03 | 3.10%  | 3.10%  | <0.01 |
| Seizure disorder, n (%)            | 237 (3.6%)    | 107 (3.7%)    | 0.01 | 3.70%  | 3.60%  | <0.01 |
| Visual impairment, n (%)           | 5,383 (81.7%) | 2,259 (78.6%) | 0.08 | 80.60% | 80.60% | <0.01 |
| Wheelchair ambulation, n (%)       | 3,676 (55.8%) | 1,364 (47.4%) | 0.17 | 53.30% | 53.70% | 0.01  |

*Performance Scales*

|                              |         |               |               |      |        |        |       |
|------------------------------|---------|---------------|---------------|------|--------|--------|-------|
| Cognitive Performance Scale* | 0       | 1,007 (15.3%) | 144 (5.0%)    | 0.35 | 12.10% | 11.40% | 0.02  |
|                              | 1       | 855 (13.0%)   | 199 (6.9%)    | 0.2  | 11.10% | 10.20% | 0.03  |
|                              | 2       | 1,261 (19.1%) | 522 (18.2%)   | 0.03 | 18.80% | 19.10% | 0.01  |
|                              | 3       | 2,241 (34.0%) | 1,323 (46.0%) | 0.25 | 37.90% | 38.80% | 0.02  |
|                              | 4       | 437 (6.6%)    | 284 (9.9%)    | 0.12 | 7.60%  | 7.80%  | 0.01  |
|                              | 5       | 519 (7.9%)    | 328 (11.4%)   | 0.12 | 8.90%  | 9%     | <0.01 |
|                              | 6       | 268 (4.1%)    | 75 (2.6%)     | 0.08 | 3.60%  | 3.60%  | <0.01 |
| Aggressive Behavior Scale*   | missing | <=5 (0.0%)    | 0 (0.0%)      | 0.02 | 0%     | 0%     | N/A   |
|                              | 0       | 3,683 (55.9%) | 1,014 (35.3%) | 0.42 | 49.60% | 49%    | 0.01  |

|                          |         |               |             |      |        |        |       |
|--------------------------|---------|---------------|-------------|------|--------|--------|-------|
|                          | 1       | 863 (13.1%)   | 402 (14.0%) | 0.03 | 13.50% | 14%    | 0.01  |
|                          | 2       | 610 (9.3%)    | 364 (12.7%) | 0.11 | 10.20% | 10.20% | <0.01 |
|                          | 3       | 582 (8.8%)    | 351 (12.2%) | 0.11 | 9.90%  | 9.90%  | <0.01 |
|                          | 4       | 262 (4.0%)    | 208 (7.2%)  | 0.14 | 4.90%  | 4.90%  | <0.01 |
|                          | 5       | 150 (2.3%)    | 155 (5.4%)  | 0.16 | 3.20%  | 3.30%  | <0.01 |
|                          | 6       | 193 (2.9%)    | 127 (4.4%)  | 0.08 | 3.40%  | 3.30%  | <0.01 |
|                          | 7       | 79 (1.2%)     | 80 (2.8%)   | 0.11 | 1.70%  | 1.70%  | <0.01 |
|                          | 8       | 55 (0.8%)     | 64 (2.2%)   | 0.11 | 1.30%  | 1.30%  | <0.01 |
|                          | 9       | 48 (0.7%)     | 48 (1.7%)   | 0.09 | 1%     | 1.10%  | 0.01  |
|                          | 10      | 22 (0.3%)     | 29 (1.0%)   | 0.08 | 0.60%  | 0.60%  | 0.01  |
|                          | 11      | 13 (0.2%)     | 11 (0.4%)   | 0.03 | 0.20%  | 0.20%  | <0.01 |
|                          | 12      | 27 (0.4%)     | 22 (0.8%)   | 0.05 | 0.50%  | 0.60%  | 0.01  |
| Depression Rating Scale* | missing | <=5 (0.0%)    | 0 (0.0%)    | 0.02 | 0%     | 0%     | N/A   |
|                          | 0       | 2,229 (33.8%) | 621 (21.6%) | 0.28 | 30.10% | 29.50% | 0.01  |
|                          | 1       | 1,013 (15.4%) | 413 (14.4%) | 0.03 | 15.10% | 15.10% | <0.01 |
|                          | 2       | 1,068 (16.2%) | 487 (16.9%) | 0.02 | 16.50% | 16.80% | 0.01  |
|                          | 3       | 683 (10.4%)   | 335 (11.7%) | 0.04 | 10.80% | 11%    | 0.01  |
|                          | 4       | 561 (8.5%)    | 317 (11.0%) | 0.08 | 9.40%  | 9.50%  | 0.01  |
|                          | 5       | 382 (5.8%)    | 203 (7.1%)  | 0.05 | 6.20%  | 6.30%  | <0.01 |
|                          | 6       | 247 (3.7%)    | 165 (5.7%)  | 0.09 | 4.30%  | 4.20%  | <0.01 |
|                          | 7       | 154 (2.3%)    | 120 (4.2%)  | 0.1  | 2.90%  | 2.90%  | <0.01 |
|                          | 8       | 111 (1.7%)    | 75 (2.6%)   | 0.06 | 1.90%  | 1.90%  | <0.01 |
|                          | 9       | 52 (0.8%)     | 53 (1.8%)   | 0.09 | 1%     | 1.10%  | <0.01 |
|                          | 10      | 41 (0.6%)     | 40 (1.4%)   | 0.08 | 0.90%  | 0.90%  | <0.01 |
|                          | 11      | 26 (0.4%)     | 24 (0.8%)   | 0.06 | 0.60%  | 0.60%  | 0.01  |
|                          | 12      | 14 (0.2%)     | 10 (0.3%)   | 0.03 | 0.20%  | 0.20%  | <0.01 |
|                          | 13      | 6 (0.1%)      | <=5 (0.1%)  | 0.01 | 0.10%  | 0.10%  | <0.01 |
|                          | 14      | 0 (0.0%)      | 8 (0.3%)    | 0.07 | 0%     | 0%     | N/A   |

Abbreviations: number (n), not applicable (N/A), standard deviation (SD), emergency room (ER), Adjusted Clinical Group (ACG), activities of daily living (ADL)

\*Higher scores indicate poorer performance on the scale (e.g. a Cognitive Performance Scale score of 6 means a patient has very severe cognitive impairment, patients with a higher Aggressive Behavior Scale score are more aggressive, patients with a higher Depression Rating Scale score have more depressive symptoms).
